# Supplementary material
Source: PubMed Central journal article supplement (PMC10327577)
Supplement: NIHMS1887353-supplement-1.pdf [file NIHMS1887353-supplement-1.pdf]

1108 **Supplemental Figure 1**

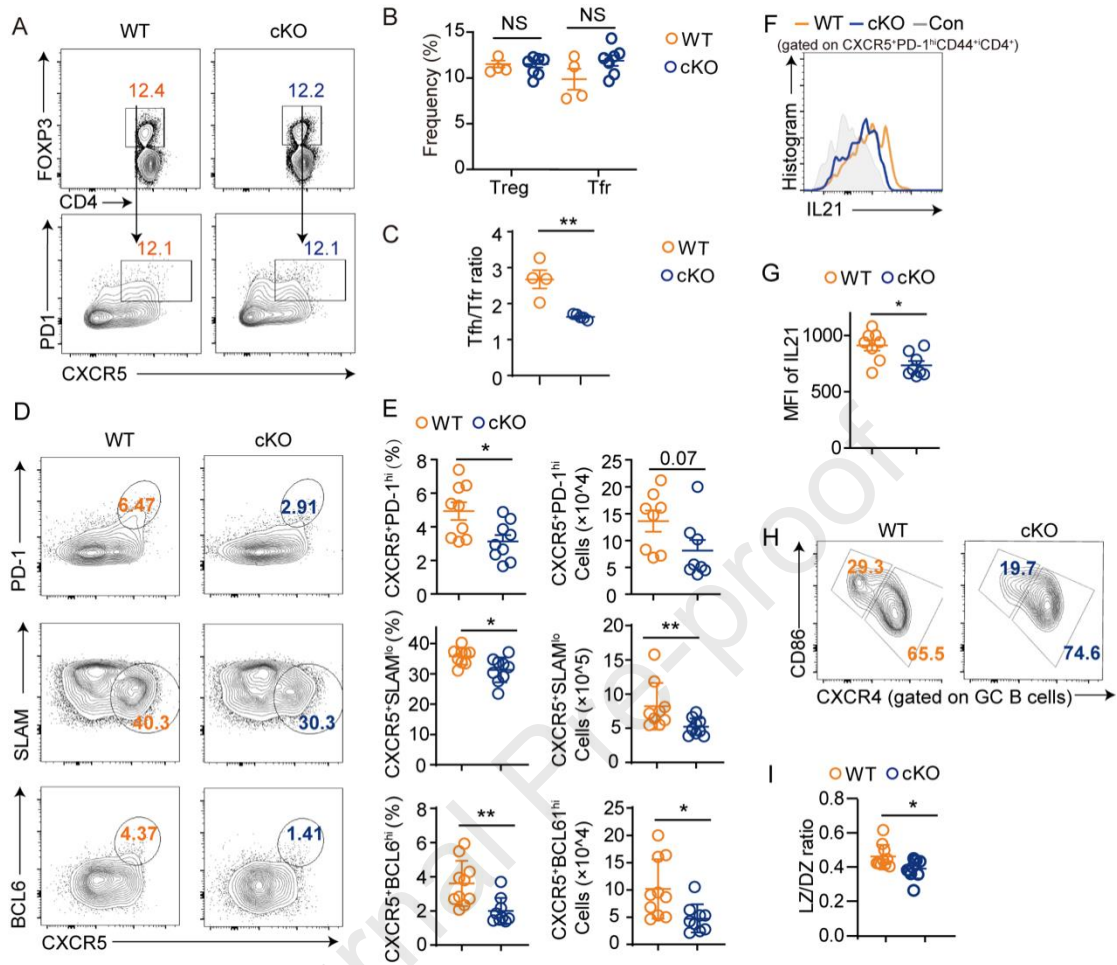

1109

1110 **Supplemental Figure 1. Impaired Tfh induction in PP2A cKO mice of NP-**  
 1111 **KLH immunization model**

1112 **(A)** Representative flow cytometric analysis of Treg and Tfr cells from mice  
 1113 immunized with SRBC on day 7. **(B)** Frequencies of populations in **A** . **(C)** The  
 1114 ratios of Tfh/Tfr for the indicated genotype. **(D-I)** PP2A WT and cKO mice were  
 1115 immunized with NP-KLH with Alum and analyzed on day 14 (n = 8-14 mice per  
 1116 genotype). **(D)** Representative flow cytometric plots of CXCR5+PD1<sup>hi</sup>,  
 1117 CXCR5+SLAM<sup>lo</sup>, CXCR5+BCL6<sup>hi</sup> populations among CD44<sup>+</sup>CD4<sup>+</sup> T cells for the

1118 indicated genotype. **(E)** Frequencies and cell numbers of populations in **D**. **(F)**  
1119 Representative flow cytometric plots of IL21 expression gated on  
1120 CXCR5<sup>+</sup>PD1<sup>+</sup>CD44<sup>+</sup>CD4<sup>+</sup> T cells for the indicated genotype. **(G)** Statistical  
1121 analysis of MFI of IL21 in **F**. **(H)** Representative flow cytometric plots of LZ GC  
1122 B (CD86<sup>+</sup>) and DZ GC B (CXCR4<sup>+</sup>) cells for the indicated genotype. **(I)**  
1123 Statistical analysis of LZ/DZ ratio in **H**. Each dot represents one individual  
1124 mouse. Data are representative of two independent experiments and analyzed  
1125 by two-sided student's t-test. Error bars of Means  $\pm$  SEM. NS, not significant;  
1126 \* $p$ <0.05; \*\* $p$ <0.01; \*\*\* $p$ <0.001.

1127 **Supplemental Figure 2**

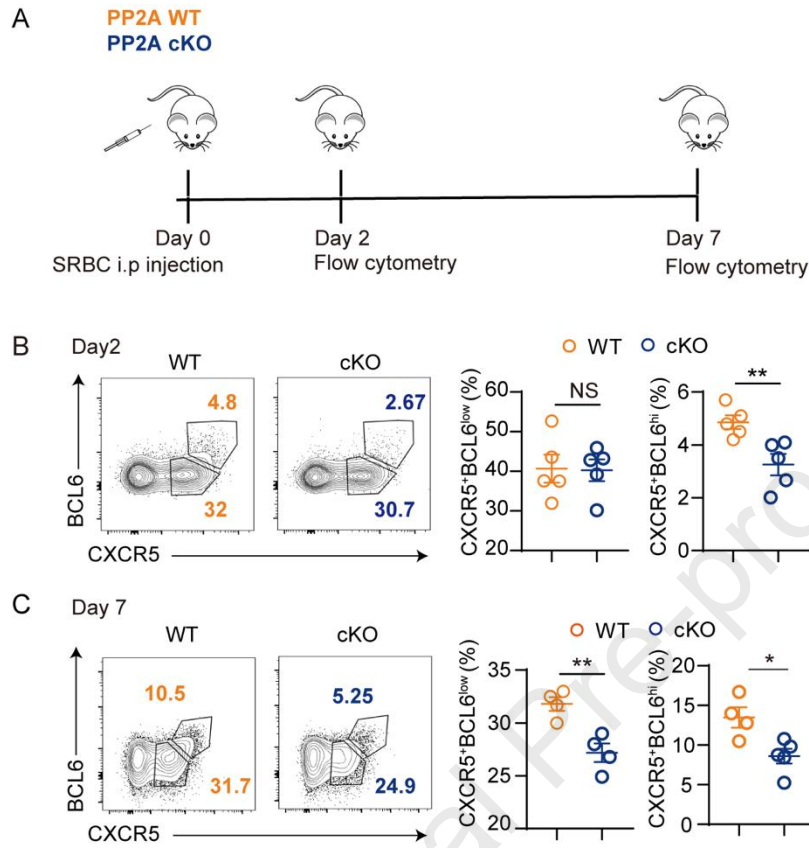

1128

1129 **Supplemental Figure 2. Pre-Tfh analysis during the time course of SRBC**  
1130 **immunization**

1131 **(A)** Schematic diagram of experimental design. Mice were immunized with  
1132 SRBCs and analyzed on day 2 and day 7 (n = 4-5 mice per genotype). **(B and**  
1133 **C)** Representative flow cytometry plots of pre-Tfh  
1134 (CXCR5<sup>+</sup>BCL6<sup>low</sup>CD44<sup>+</sup>CD4<sup>+</sup>) and Tfh (CXCR5<sup>+</sup>BCL6<sup>hi</sup>CD44<sup>+</sup>CD4<sup>+</sup>) cells at  
1135 the two different time points as illustrated in **A**. Each dot represented one  
1136 individual mouse. Data are representative of two independent experiments and

1137 analyzed by two-sided student's t-test. Error bars of Means  $\pm$  SEM. NS, not  
1138 significant; \* $p < 0.05$ ; \*\* $p < 0.01$ ; \*\*\* $p < 0.001$ .

Journal Pre-proof

1139 **Supplemental Figure 3**

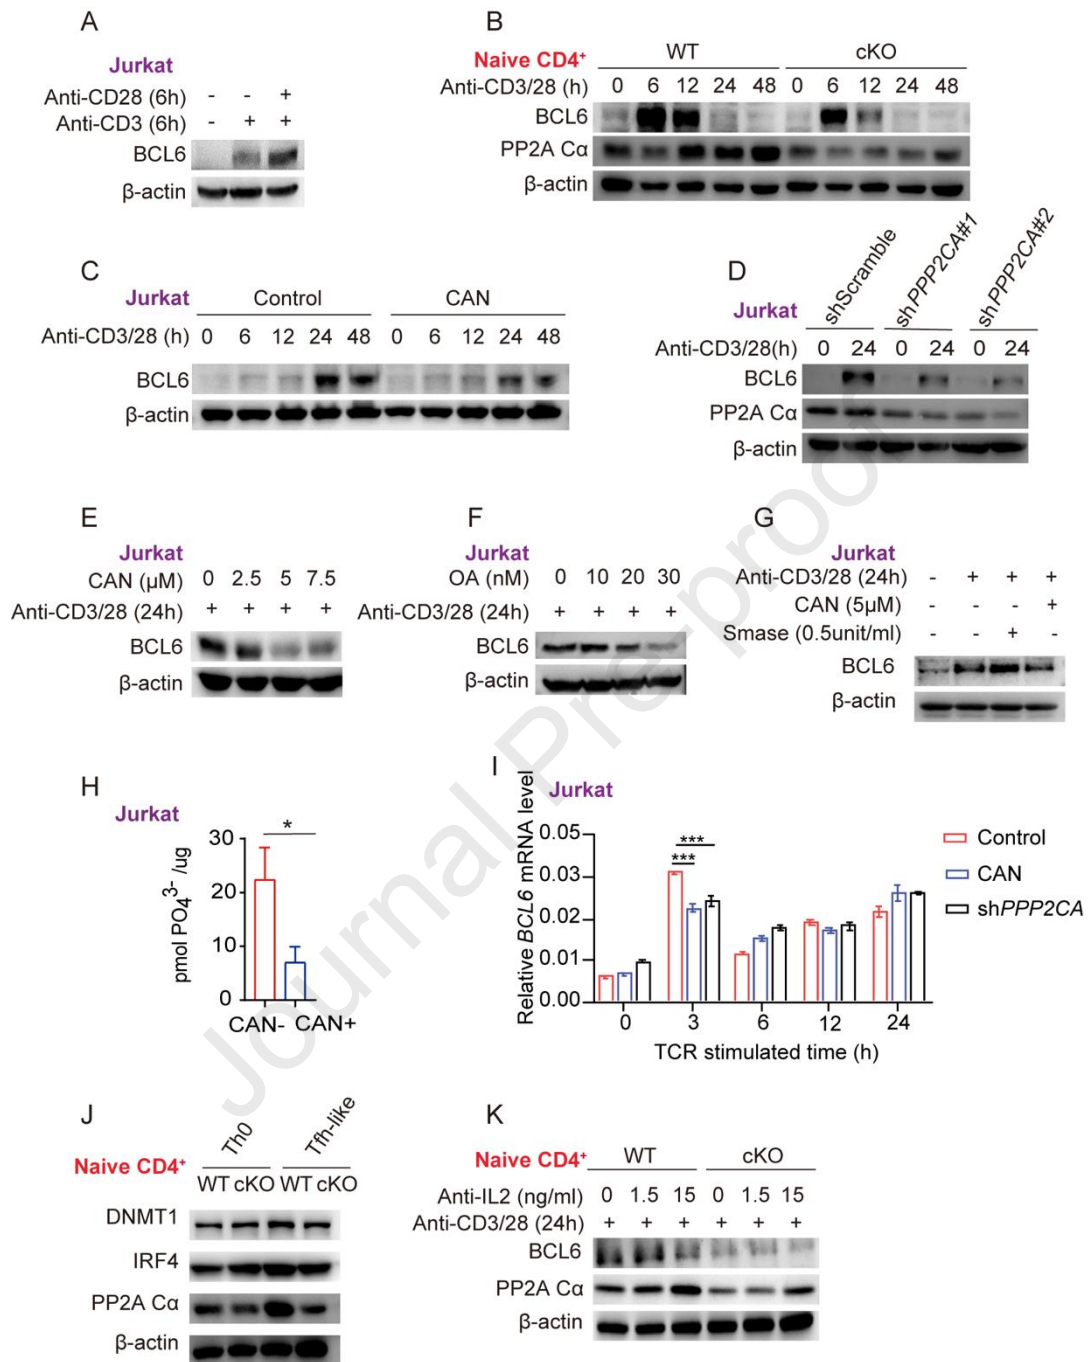

1140

1141 **Supplemental Figure 3. PP2A Ca controls BCL6 protein expression but**  
 1142 **not transcription**

1143 **(A)** Jurkat cells were cultured under indicated conditions for 24 hours. The  
1144 expression of BCL6 and PP2A C $\alpha$  was analyzed by western blotting. **(B-C)**  
1145 Naive CD4<sup>+</sup> T cells from PP2A WT or cKO mice or Jurkat cells cocultured with  
1146 or without CAN (5 $\mu$ M) were stimulated with anti-CD3/28 antibodies for the  
1147 indicated time. The expression of BCL6 and PP2A C $\alpha$  was analyzed by western  
1148 blotting. **(D)** PP2A C $\alpha$  was knockdown in Jurkat cells by shRNA and stimulated  
1149 with anti-CD3/28 antibodies for the indicated time. The expression of BCL6 and  
1150 PP2A C $\alpha$  was analyzed by western blotting. **(E-F)** Jurkat cells were cocultured  
1151 with indicated concentrations of PP2A inhibitor CAN or OA and stimulated with  
1152 anti-CD3/28 antibodies for 24 hours. The expression of BCL6 was analyzed by  
1153 western blotting. **(G)** Jurkat cells treated with PP2A inhibitor CAN or PP2A  
1154 activator SMase and stimulated with anti-CD3/28 antibodies for 24 hours. The  
1155 expression levels of BCL6 were analyzed by western blotting. **(H)** Jurkat cells  
1156 were cocultured with or without PP2A inhibitor CAN (5 $\mu$ M) for 24 hours. The  
1157 PP2A dephosphorylation activity was measured from the lysate of the treated  
1158 Jurkat cells. **(I)** Jurkat cells treated with PP2A inhibitor CAN or transfected with  
1159 sh*PPP2CA* were cultured under anti-CD3/28 stimulation for the indicated time.  
1160 The expression of *BCL6* mRNA was measured by qPCR. **(J)** Naive CD4<sup>+</sup> T  
1161 cells were cultured under Th0 or Tfh-like condition. The expression of DNMT1,  
1162 IRF4, and PP2A C $\alpha$  was analyzed by western blotting. **(K)** Naive CD4<sup>+</sup> T cells  
1163 were cultured with anti-IL2 neutralizing antibodies for the indicated  
1164 concentration and stimulated with anti-CD3/28 antibodies for 24 hours. The

1165 expression of BCL6 and PP2A C $\alpha$  was analyzed by western blotting. Data are  
1166 representative of two independent experiments and analyzed by two-sided  
1167 student's t-test; Error bars of Means  $\pm$  S.D. \* $p$ <0.05; \*\* $p$ <0.01; \*\*\* $p$ <0.001.

Journal Pre-proof

1168 **Supplemental Figure 4**

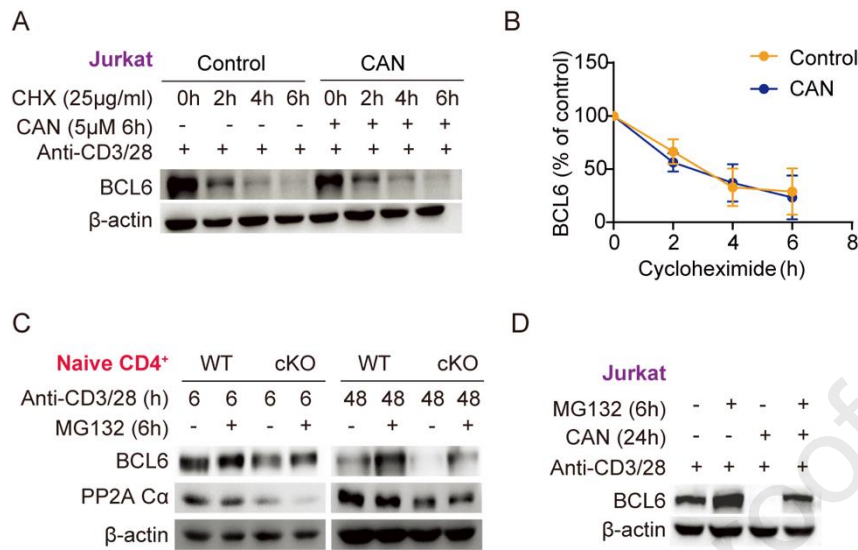

1169

1170 **Supplemental Figure 4. Protein degradation of BCL6 is unaffected in**  
 1171 **PP2A deficient T cells**

1172 **(A)** Jurkat cells were stimulated with anti-CD3/28 antibodies and treated with or  
 1173 without PP2A inhibitor CAN. BCL6 protein stability was evaluated by the cells  
 1174 cultured with vehicle or cycloheximide (100 µg/ml) for the indicated time by  
 1175 western blotting. **(B)** Quantification of BCL6 signal intensity by densitometry  
 1176 over the time course of cycloheximide treatments from **A**. The levels of BCL6  
 1177 in the vehicle-treated controls were set as 100%. **(C)** Naive CD4<sup>+</sup> T cells from  
 1178 PP2A WT or cKO mice or **(D)** Jurkat cells were cultured under anti-CD3/28  
 1179 antibodies stimulation for the indicated time and MG132 (20µM) was added in  
 1180 the last 6 hours. The expression of BCL6 was analyzed by western blotting.  
 1181 Data are representative of two independent experiments and analyzed by two-  
 1182 sided student's t-test. Error bars of Means ± S.D. \* $p < 0.05$ ; \*\* $p < 0.01$ ;  
 1183 \*\*\* $p < 0.001$ .



1184 **Supplementary Figure 5**

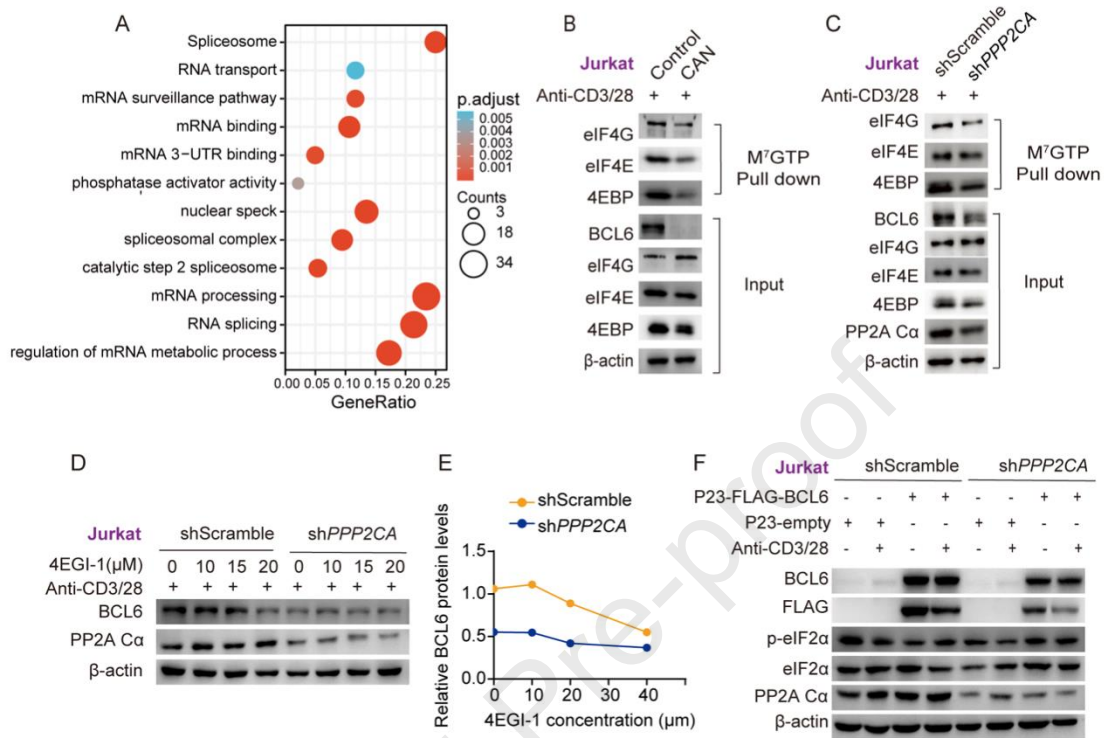

1185

1186 **Supplemental Figure 5. Protein synthesis of BCL6 is decreased in PP2A**

1187 **Cα deficiency**

1188 **(A)** KEGG hallmark gene sets enrichment analysis was performed on 371

1189 published proteins, whose Ser/Thr phosphorylation levels were significantly

1190 changed by comparing CD3-stimulated PP2A-deficient thymocytes to their

1191 CD3-stimulated WT controls. Ser/Thr phosphor-peptide profiling was measured

1192 by a phosphoproteomics assay (mass spectrometry-based iTRAQ phosphor-

1193 peptide analysis). **(B)** Assembly of the eIF4F complex was evaluated by

1194 western blotting after M<sup>7</sup>GTP immunoprecipitation using extracts from anti-

1195 CD3/28 antibodies activated Jurkat cells cultured with or without PP2A inhibitor

1196 CAN for 24 hours. **(C)** Assembly of the eIF4F complex was evaluated by  
1197 western blotting after M<sup>7</sup>GTP immunoprecipitation using extracts from anti-  
1198 CD3/28 antibodies activated Jurkat cells transfected with shScramble or  
1199 shPPP2CA for 24 hours. **(D)** Jurkat cells transfected with shScramble or  
1200 shPPP2CA were cultured with anti-CD3/28 antibodies stimulation and treated  
1201 with vehicle control or the indicated doses of 4EGI-1 for 24 hours. The  
1202 expression of BCL6 was analyzed by western blotting. **(E)** Quantification of  
1203 BCL6 signal intensity by densitometry over the time course of 4EGI-1 treatment.  
1204 The levels of  $\beta$ -actin were set as control. **(F)** Jurkat cells were then transfected  
1205 with shScramble or shPPP2AC for the indicated condition and assessed the  
1206 levels of BCL6, FLAG, and phosphorylation status of eIF2 $\alpha$  by western blotting.  
1207 Data are representative of at least two independent experiments with similar  
1208 results.



1213 **(A-C)** Western blot analysis of S6K, and p-S6K (Ser371) or p-S6K (Thr389)  
1214 levels from PP2A WT and cKO naive CD4<sup>+</sup> T cells which were stimulated with  
1215 anti-CD3/28 antibodies for the indicated time. BCL6 was evaluated at 6 hour  
1216 time point. **(D)** Western blot analysis of 4EBP, p-4EBP(Thr70), S6K, and p-S6K  
1217 (Thr389) in scramble or shPPP2CA#1 shRNA transduced Jurkat cells. Cells  
1218 were stimulated with anti-CD3/28 antibodies for the indicated time. **(E)** Western  
1219 blot analysis of the BCL6, S6K, and p-S6K levels from PP2A WT and cKO naive  
1220 CD4<sup>+</sup> T cells which were treated with or without Rapa (20 $\mu$ M) and stimulated  
1221 with anti-CD3/28 antibodies for 6 hours. **(F)** PMX-HA-*ppp2ca* or PMX-empty  
1222 constructs were transfected in WT or cKO naïve CD4<sup>+</sup> T cells. Cells were either  
1223 stimulated or unstimulated with the plate bounded anti-CD3/28 antibodies for  
1224 24 hours. The expression of BCL6, HA, and PP2A C $\alpha$  was analyzed by western  
1225 blotting. **(G)** Flow cytometry analysis of p-S6 (Ser235/236) and p-4EBP  
1226 (Thr37/46) in Jurkat T cells transfected with shScramble, shPPP2CA#1 or  
1227 shPPP2CA#2, or treated with CAN (5 $\mu$ M). Cells were stimulated with or without  
1228 anti-CD3 plus anti-CD28 (2 $\mu$ g/ml) for 24 hours. **(H)** Quantification of the MFI of  
1229 the proteins measured in G. **(I)** Flow cytometry analysis of p-S6 (Ser235/236)  
1230 and p-4EBP (Thr37/46) in WT and cKO naive CD4<sup>+</sup> T cells. Cells were  
1231 stimulated with or without anti-CD3/CD28 (2  $\mu$ g/ml) for 6 hours. **(J).**  
1232 Quantification of the MFI of the proteins measured in I (n = 3 mice per treatment  
1233 group). Data are representative of two independent experiments with similar  
1234 results. Phosphorylation levels were analyzed by calculating the greyscale ratios

1235 of phosphorylated proteins to their total proteins. Relative Bcl6/PP2A Ca protein  
1236 levels were normalized by greyscale ratios of Bcl6 protein to their  $\beta$ -actin  
1237 controls (Fig. S6A-F) . Data are representative of two independent experiments  
1238 and analyzed by two-sided student's t-test. Error bars of Means  $\pm$  S.D in **H**,  
1239 Means  $\pm$  SEM in **J**. \* $p$ <0.05; \*\* $p$ <0.01; \*\*\* $p$ <0.001, \*\*\*\* $p$ <0.0001.

Journal Pre-proof

1240 **Supplemental Figure 7**

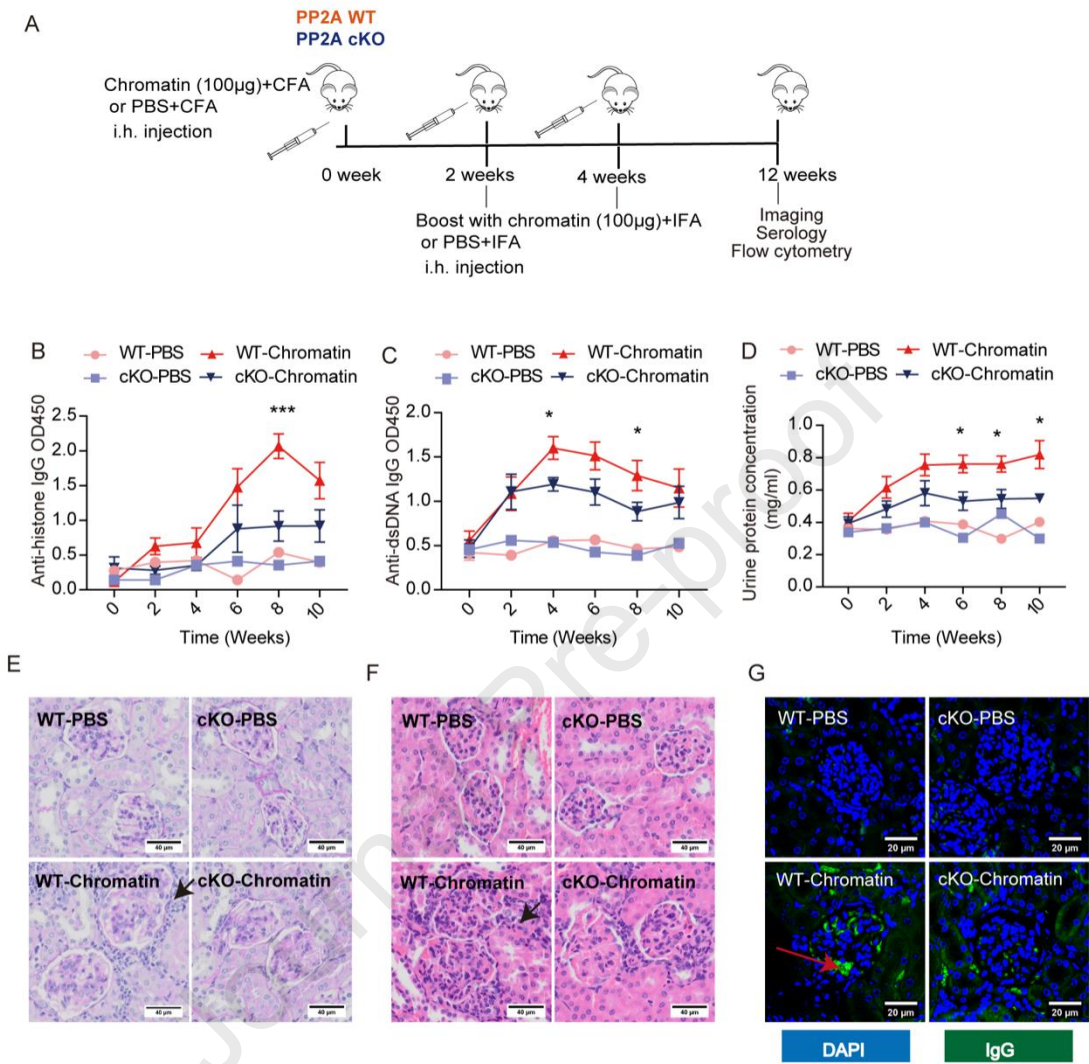

1241

1242 **Supplemental Figure 7. PP2A Ca deficiency protects mice from SLE**

1243 **(A-E)** Schematic diagram of experimental design. **(A)** Mice were immunized  
 1244 with chromatin in CFA and boosted twice with chromatin in IFA on day 14 and  
 1245 28 after the first immunization. Mice immunized with PBS emulsified in  
 1246 adjuvants were used as controls. The mice were analyzed on day 84 (6-8 mice  
 1247 in chromatin induced experimental group, 3 mice in PBS experimental group).

1248 **(B and C)** Anti-dsDNA and anti-histone specific antibodies in serum were  
1249 detected by ELISA. **(D)** The urine protein levels of the mice were analyzed by  
1250 BCA. **(E)** Representative PAS staining of the glomerular areas from the  
1251 kidneys. Original magnification,  $\times 40$ . Bars represent  $40\ \mu\text{m}$ . **(F)** Representative  
1252 H&E staining of the glomerular areas from the kidneys. Black arrows, infiltration  
1253 of numerous lymphocytes; red arrow, crescent. Original magnification,  $\times 40$ .  
1254 Bars represent  $40\ \mu\text{m}$ . **(G)** Immunofluorescence staining of IgG deposition in  
1255 the glomerulus was presented. Red arrow, immune complex precipitation.  
1256 Original magnification,  $\times 40$ . Bars represent  $20\ \mu\text{m}$ . Each dot represents one  
1257 individual. Data are representative of two independent experiments and  
1258 analyzed by two-sided student's t-test. Error bars of Means  $\pm$  SEM. \* $p < 0.05$ ;  
1259 \*\* $p < 0.01$ ; \*\*\* $p < 0.001$ .

1260 **Supplemental Figure 8**

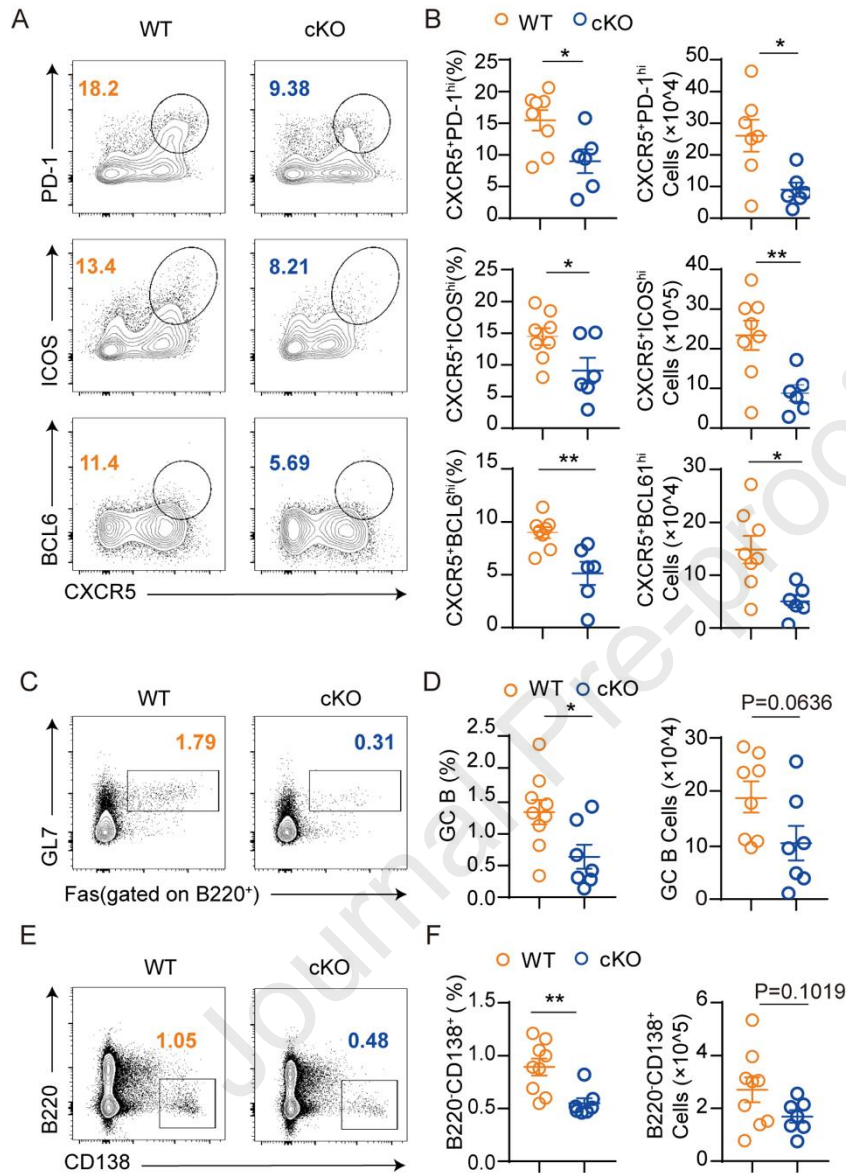

1261

1262 **Supplemental Figure 8. Tfh cell development is impaired in PP2A Cα**  
 1263 **deficient mice with SLE**

1264 (A) Representative flow cytometric plots of CXCR5<sup>+</sup>PD1<sup>hi</sup>, CXCR5<sup>+</sup>ICOS<sup>hi</sup>,  
 1265 CXCR5<sup>+</sup>BCL6<sup>hi</sup> Tfh in CD4<sup>+</sup>CD44<sup>+</sup> T cells for the indicated genotype. (B)  
 1266 Frequencies and cell numbers of populations in A. (C) Representative flow



1267 cytometric analysis of GL7<sup>+</sup>Fas<sup>+</sup> GC B cells from the indicated genotype. **(D)**  
1268 Frequencies and cell numbers of GC B cells in **C**. **(E)** Representative flow  
1269 cytometric plots of plasma cells (B220<sup>-</sup>CD138<sup>+</sup>) for the indicated genotype. **(F)**  
1270 Frequencies and cell numbers of plasma cells in **E**. Each dot represented one  
1271 individual. Data are representative of two independent experiments and  
1272 analyzed by two-sided student's t test. Error bars of Means  $\pm$  SEM. \* $p < 0.05$ ;  
1273 \*\* $p < 0.01$ ; \*\*\* $p < 0.001$ .

1274

1275

1276

1277

1278

1279

1280

1281

1282

1283 **Supplemental Figure 9**

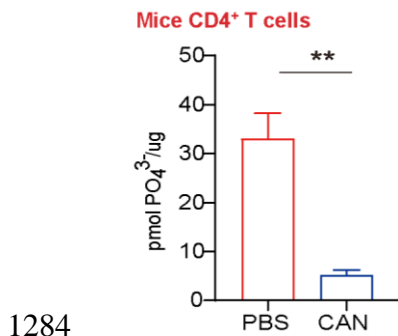

1285 **Supplemental Figure 9. PP2A dephosphorylation activity in CD4<sup>+</sup> T cells**  
1286 **of CAN treated mice.**

1287 PP2A inhibitor CAN (0.5 mg/kg) or PBS was administered i.p. every two days  
1288 for two weeks in WT mice. PP2A dephosphorylation activity was measured in  
1289 splenic CD4<sup>+</sup> T cells. Data were analyzed by two-sided student's t test. Error  
1290 bars of Means  $\pm$  SEM. \*\*p<0.01.

1291

1292

1293 **Supplemental Table 1.** Differentially expressed genes between stimulated

1294 WT and cKO naïve CD4 T cells (attached table in excel)

|          | <b>logFC</b> | <b>logCPM</b> | <b>F</b>    | <b>PValue</b> | <b>FDR</b>  | <b>sig</b> |
|----------|--------------|---------------|-------------|---------------|-------------|------------|
| Pcna-ps2 | 2.358373573  | 3.176183912   | 293.0808048 | 1.49E-11      | 8.16E-07    | down       |
| Oasl2    | 1.711533414  | 3.440861989   | 227.1737872 | 9.82E-11      | 2.01E-06    | down       |
| Fos      | 0.65464276   | 9.034022517   | 223.6160528 | 1.10E-10      | 2.01E-06    | up         |
| Xaf1     | 1.141307441  | 5.243336106   | 176.5782114 | 6.16E-10      | 8.44E-06    | up         |
| Ccdc117  | 0.802314818  | 6.911182249   | 164.1228938 | 1.04E-09      | 1.14E-05    | up         |
| Ifit3    | 1.313496364  | 4.541657864   | 130.1888764 | 5.42E-09      | 4.41E-05    | up         |
| Slc15a2  | 3.277697505  | 4.911031782   | 257.0813123 | 6.11E-09      | 4.41E-05    | up         |
| P2ry10   | 0.485340338  | 10.35973078   | 125.2663004 | 7.10E-09      | 4.41E-05    | down       |
| Phf6     | 0.542461228  | 7.756959554   | 122.398154  | 8.35E-09      | 4.41E-05    | down       |
| Lif      | 0.818218928  | 6.65090973    | 121.6606923 | 8.71E-09      | 4.41E-05    | up         |
| Irf7     | 0.939607565  | 5.792605566   | 121.3624219 | 8.86E-09      | 4.41E-05    | up         |
| Dusp2    | 0.57177292   | 7.424229498   | 119.2066249 | 1.00E-08      | 4.58E-05    | up         |
| Dusp1    | 0.564649585  | 7.714138729   | 114.0344965 | 1.37E-08      | 5.55E-05    | up         |
| Nfkbia   | 0.494163323  | 8.666884779   | 110.8687556 | 1.66E-08      | 5.55E-05    | up         |
| Hbb-bs   | 2.016440074  | 4.151088713   | 132.015899  | 1.67E-08      | 5.55E-05    | up         |
| Hbb-bt   | 1.981476324  | 3.047206365   | 110.632951  | 1.69E-08      | 5.55E-05    | up         |
| Ifit3b   | 1.660419344  | 2.53904725    | 110.2892138 | 1.72E-08      | 5.55E-05    | up         |
| Kras     | 0.452172882  | 8.579212469   | 104.9220233 | 2.43E-08      | 7.39E-05    | down       |
| Ddit4    | 0.922107667  | 4.859347742   | 103.9845085 | 2.58E-08      | 7.45E-05    | up         |
| Crebrf   | 0.450775627  | 9.05990522    | 102.9279471 | 2.77E-08      | 7.59E-05    | down       |
| H2-T22   | 0.442321009  | 7.976353924   | 102.0484857 | 2.94E-08      | 7.66E-05    | up         |
| Gm18562  | 3.390406999  | 1.367191404   | 101.2011125 | 3.11E-08      | 7.74E-05    | down       |
| Icam1    | 0.766917765  | 4.89439312    | 99.54553554 | 3.48E-08      | 8.12E-05    | up         |
| Crbn     | 0.446670343  | 8.509928303   | 99.22264448 | 3.56E-08      | 8.12E-05    | down       |
| Sgk1     | 0.63890217   | 5.868607101   | 97.41535323 | 4.03E-08      | 8.84E-05    | up         |
| Zfp36    | 0.493825349  | 8.73416079    | 95.02218883 | 4.77E-08      | 9.91E-05    | up         |
| Jun      | 0.567243984  | 7.72901678    | 94.71258229 | 4.88E-08      | 9.91E-05    | up         |
| Tbc1d15  | 0.390043788  | 8.961284411   | 90.77732835 | 6.50E-08      | 0.00012725  | down       |
| Ifit1    | 0.895715809  | 4.395796705   | 85.51247582 | 9.71E-08      | 0.000183465 | up         |
| Gm8730   | 1.054058278  | 9.917004909   | 130.4717581 | 1.04E-07      | 0.000189113 | up         |
| Rras2    | 0.473722523  | 8.492302617   | 83.287803   | 1.16E-07      | 0.000198224 | down       |
| Hsph1    | 0.567262642  | 6.640860139   | 82.7563567  | 1.21E-07      | 0.00020058  | up         |

|               |              |             |             |          |             |      |
|---------------|--------------|-------------|-------------|----------|-------------|------|
| Il7r          | 0.430136439  | 9.391770412 | 80.7368608  | 1.42E-07 | 0.000221762 | down |
| Cpt1a         | 0.489301268  | 6.709289248 | 80.45211229 | 1.46E-07 | 0.000221762 | up   |
| Zc3h12d       | 0.659133899  | 5.758278652 | 79.53133189 | 1.57E-07 | 0.000232844 | down |
| Vegfa         | 1.190101122  | 3.04891698  | 76.44119051 | 2.04E-07 | 0.000294378 | up   |
| Ppp2ca        | 0.465320926  | 8.701059667 | 74.16811433 | 2.49E-07 | 0.00034958  | down |
| Cblb          | 0.558873922  | 8.987617473 | 73.34035226 | 2.68E-07 | 0.000366766 | down |
| Smad4         | 0.378524936  | 8.095119979 | 72.26273606 | 2.95E-07 | 0.000387209 | down |
| Dusp6         | 0.60829175   | 5.7985514   | 72.19005965 | 2.97E-07 | 0.000387209 | up   |
| Actr10        | 0.464690541  | 6.7271792   | 69.58966194 | 3.77E-07 | 0.000479854 | down |
| Trim30a       | 0.447073193  | 6.710424827 | 66.86728054 | 4.87E-07 | 0.000606521 | up   |
| Hspa1b        | 1.461075215  | 3.558810084 | 66.25411838 | 5.54E-07 | 0.000654578 | up   |
| Pim1          | 0.408815007  | 8.795786318 | 65.53046943 | 5.54E-07 | 0.000654578 | up   |
| Arl5c         | 0.43615359   | 6.531360894 | 64.51713235 | 6.13E-07 | 0.000665901 | up   |
| Gadd45a       | 0.819724557  | 3.772671138 | 64.39654944 | 6.20E-07 | 0.000665901 | up   |
| Sln5          | 0.456126052  | 6.140468171 | 64.15831665 | 6.35E-07 | 0.000668719 | up   |
| Gm9625        | 1.060953342  | 7.472893739 | 90.82218543 | 6.55E-07 | 0.000670684 | up   |
| Usp18         | 0.911851002  | 4.02694886  | 63.32198694 | 6.90E-07 | 0.00068056  | up   |
| Purb          | 0.383897195  | 8.808019455 | 63.24139761 | 6.96E-07 | 0.00068056  | down |
| Drc1          | 1.678655943  | 2.161683664 | 62.57077924 | 7.44E-07 | 0.000709646 | up   |
| Cish          | 0.552648884  | 5.078241956 | 62.47767248 | 7.51E-07 | 0.000709646 | up   |
| Bhlhe40       | 0.611464081  | 5.364525182 | 62.31182773 | 7.64E-07 | 0.000709646 | up   |
| Rnf19b        | 0.57873479   | 6.568239643 | 61.91993466 | 7.95E-07 | 0.000726287 | up   |
| Klf7          | 0.458760024  | 7.634055979 | 61.42092259 | 8.37E-07 | 0.000751921 | down |
| Plk2          | 0.669505299  | 4.550590853 | 60.83513743 | 8.89E-07 | 0.000780589 | up   |
| Gadd45b       | 0.496067057  | 7.800508526 | 60.74724029 | 8.98E-07 | 0.000780589 | up   |
| Tmem30a       | -0.448584178 | 7.527703521 | 60.56225824 | 9.15E-07 | 0.000783321 | down |
| Pde3b         | -0.406644814 | 9.135578013 | 59.67663419 | 1.00E-06 | 0.00084626  | down |
| Tbc1d30       | -0.427332429 | 6.822539892 | 59.39326522 | 1.03E-06 | 0.000858753 | down |
| Tent5a        | -0.558854054 | 5.31321268  | 57.49986096 | 1.27E-06 | 0.001021033 | down |
| 1110032F04Rik | -0.699364317 | 4.516434356 | 57.29672389 | 1.30E-06 | 0.00102871  | down |
| Mx1           | 1.350692478  | 2.70237368  | 56.62369984 | 1.39E-06 | 0.001076128 | up   |
| Cmpk2         | 0.945682915  | 3.072895826 | 55.89791049 | 1.51E-06 | 0.001134041 | up   |
| Sit1          | 0.623558196  | 5.140644905 | 54.45782436 | 1.78E-06 | 0.001291133 | up   |
| Sppl2a        | -0.405247375 | 6.348354618 | 54.20196038 | 1.83E-06 | 0.001291133 | down |
| Rsad2         | 0.786318171  | 4.44091517  | 54.15535438 | 1.84E-06 | 0.001291133 | up   |
| Tfrc          | 0.461856799  | 6.827610514 | 53.88101451 | 1.90E-06 | 0.001298891 | up   |

|          |              |             |             |          |             |      |
|----------|--------------|-------------|-------------|----------|-------------|------|
| Ppp4r2   | -0.379721031 | 8.028583284 | 53.28573539 | 2.03E-06 | 0.001373632 | down |
| Rflnb    | -0.423541517 | 7.789690547 | 52.99463474 | 2.10E-06 | 0.001403322 | down |
| Tspan13  | -0.546138195 | 7.326500811 | 52.2446493  | 2.29E-06 | 0.001487677 | down |
| Relt     | 0.686693141  | 3.971052634 | 52.0766677  | 2.34E-06 | 0.001487677 | up   |
| mt-Nd6   | -0.446370966 | 9.250958592 | 51.64986212 | 2.46E-06 | 0.001530517 | down |
| Ssh2     | -0.413095175 | 10.62227243 | 50.97976796 | 2.66E-06 | 0.001638746 | down |
| Ddx58    | 0.466547408  | 6.680883798 | 50.56320297 | 2.80E-06 | 0.001703474 | up   |
| Lrig1    | -0.408322838 | 7.819380555 | 50.274683   | 2.90E-06 | 0.001744343 | down |
| Ccrl2    | 1.352626217  | 2.111572662 | 49.20887782 | 3.30E-06 | 0.001956598 | up   |
| Fli1     | -0.488691427 | 7.531837055 | 49.1534375  | 3.32E-06 | 0.001956598 | down |
| Twsg1    | -0.387614856 | 6.87321406  | 48.91233689 | 3.42E-06 | 0.001973111 | down |
| H2-T23   | 0.418515477  | 7.240032292 | 48.62350483 | 3.55E-06 | 0.002023539 | up   |
| lfi203   | 0.442971883  | 7.361284427 | 48.44900241 | 3.62E-06 | 0.002046514 | up   |
| Cd86     | 0.809240221  | 3.136653947 | 48.31683367 | 3.68E-06 | 0.002059208 | up   |
| H2-T24   | 0.734444664  | 4.339942117 | 48.16214434 | 3.76E-06 | 0.002078101 | up   |
| Errfi1   | 0.517420259  | 5.4377037   | 46.66358665 | 4.54E-06 | 0.002392788 | up   |
| Mx2      | 1.252293236  | 2.552061374 | 46.50756139 | 4.63E-06 | 0.002392788 | up   |
| Adam19   | 0.893904364  | 4.595191488 | 46.26235553 | 4.78E-06 | 0.002446296 | up   |
| Arrb2    | 0.514072973  | 5.935713774 | 45.75679367 | 5.10E-06 | 0.002573745 | up   |
| Cry1     | -0.427047778 | 6.473004158 | 45.67752591 | 5.15E-06 | 0.002573745 | down |
| Mov10    | 0.531661325  | 4.97583142  | 44.46651609 | 6.04E-06 | 0.002888527 | up   |
| Amn1     | -1.157096619 | 3.279891076 | 43.99408624 | 6.43E-06 | 0.003038807 | down |
| Zbp1     | 0.940867043  | 5.756446919 | 53.17361849 | 6.60E-06 | 0.003077532 | up   |
| Ctsw     | 0.794729251  | 4.130186906 | 43.7720508  | 6.63E-06 | 0.003077532 | up   |
| Arc      | 0.750208478  | 3.840134905 | 43.07315964 | 7.28E-06 | 0.003312047 | up   |
| Tagap1   | 0.470653025  | 6.397739902 | 42.41564751 | 7.97E-06 | 0.003493132 | up   |
| Rock1    | -0.392718213 | 8.759085538 | 42.01268239 | 8.43E-06 | 0.003629488 | down |
| Ighm     | 0.451209     | 7.099426827 | 41.97496753 | 8.47E-06 | 0.003629488 | up   |
| Rasgef1b | 0.788492272  | 3.245884541 | 41.9366926  | 8.51E-06 | 0.003629488 | up   |
| Gm9522   | 2.201187397  | 0.885563479 | 41.9103279  | 8.55E-06 | 0.003629488 | up   |
| Hspa4l   | -0.456048383 | 6.920530791 | 41.61093126 | 8.91E-06 | 0.003717854 | down |
| Psme2    | 0.497138467  | 6.091755364 | 41.57225419 | 8.96E-06 | 0.003717854 | up   |
| Zbtb7b   | 0.627795075  | 4.808251821 | 41.18668238 | 9.45E-06 | 0.003865584 | up   |
| E2f2     | 0.962397412  | 2.673049202 | 40.90756155 | 9.83E-06 | 0.003938552 | up   |
| Ly6c2    | 1.438947102  | 2.684635875 | 40.86061645 | 9.90E-06 | 0.003938552 | up   |
| Pim3     | 0.471248441  | 5.780827479 | 40.79437718 | 9.99E-06 | 0.003938552 | up   |

|          |              |             |             |          |             |      |
|----------|--------------|-------------|-------------|----------|-------------|------|
| Cpsf2    | -0.433644886 | 6.104592076 | 40.60554638 | 1.03E-05 | 0.004016538 | down |
| Fam8a1   | -0.396785089 | 6.103420323 | 40.44887706 | 1.05E-05 | 0.004077925 | down |
| Aes      | 0.379600655  | 6.931832632 | 39.7633538  | 1.16E-05 | 0.004374906 | up   |
| Prr3     | 0.55993579   | 4.331727488 | 39.66567506 | 1.17E-05 | 0.004406656 | up   |
| Nubp2    | 0.630429289  | 4.933029728 | 39.2789588  | 1.24E-05 | 0.004582821 | up   |
| Hdac7    | 0.402806467  | 6.226486602 | 39.19598832 | 1.26E-05 | 0.004591772 | up   |
| Ell2     | -0.489695927 | 5.49281464  | 38.67687914 | 1.36E-05 | 0.004873618 | down |
| Ly9      | 0.469322583  | 7.065512777 | 37.70881815 | 1.57E-05 | 0.005363591 | up   |
| Ubl4a    | -0.548723166 | 4.600156934 | 37.31606359 | 1.66E-05 | 0.005654963 | down |
| Trim13   | -0.527521917 | 4.923563154 | 37.22006786 | 1.69E-05 | 0.005702261 | down |
| Klhl28   | -0.383913253 | 6.490443935 | 36.98911939 | 1.75E-05 | 0.00583363  | down |
| Rtn4r1   | 0.635626398  | 3.557727929 | 36.93361682 | 1.76E-05 | 0.005847456 | up   |
| lfi206   | 0.385119595  | 6.379984484 | 36.52549137 | 1.87E-05 | 0.006186415 | up   |
| lsg20    | 0.735078484  | 3.819189111 | 36.24969218 | 1.96E-05 | 0.006338369 | up   |
| lfi27l2a | 0.692665949  | 6.738185944 | 42.05803101 | 1.97E-05 | 0.006338369 | up   |
| Arhgef2  | 0.540979497  | 5.458774367 | 36.06433758 | 2.01E-05 | 0.006373563 | up   |
| Dusp4    | 0.506142     | 4.79697031  | 35.77583235 | 2.10E-05 | 0.006589538 | up   |
| P2rx7    | 0.972659316  | 3.303824748 | 35.7349874  | 2.12E-05 | 0.006593942 | up   |
| Gcn11    | 0.465997627  | 6.926711411 | 35.62099409 | 2.16E-05 | 0.006658128 | up   |
| Utp14b   | -0.445402024 | 6.979021645 | 35.36662614 | 2.24E-05 | 0.006830031 | down |
| Arhgap5  | -0.551866782 | 4.948041227 | 35.06681346 | 2.35E-05 | 0.007120868 | down |
| Rnf213   | 0.774871431  | 9.461096477 | 50.62011904 | 2.40E-05 | 0.007225642 | up   |
| Abcb1a   | -0.578711494 | 4.821452154 | 34.51218904 | 2.57E-05 | 0.007576085 | down |
| Arap2    | -0.463913986 | 8.684467329 | 35.69434474 | 2.59E-05 | 0.007576085 | down |
| Nabp2    | 0.71022013   | 3.655452913 | 34.31581629 | 2.65E-05 | 0.007685921 | up   |
| Trem12   | 0.390102395  | 6.436418249 | 34.27050212 | 2.67E-05 | 0.007701304 | up   |
| Dhx58    | 0.630463533  | 3.95384658  | 34.18675429 | 2.71E-05 | 0.007747225 | up   |
| AC102496 | -0.974873693 | 2.400859761 | 33.7967946  | 2.88E-05 | 0.008100234 | down |
| Camsap2  | -0.411473229 | 7.592401414 | 33.6625398  | 2.95E-05 | 0.008236626 | down |
| mt-Te    | -0.575325385 | 3.977654969 | 33.29873072 | 3.13E-05 | 0.008652586 | down |
| Sesn2    | 0.52556892   | 4.586892136 | 33.25240779 | 3.15E-05 | 0.008674772 | up   |
| Cd52     | 0.455494351  | 7.845368414 | 32.88345132 | 3.38E-05 | 0.009068898 | up   |
| Ctsd     | 0.389964369  | 7.579894318 | 32.76604059 | 3.41E-05 | 0.009124362 | up   |
| Gm19951  | 1.70038555   | 0.387377692 | 32.64083914 | 3.49E-05 | 0.009270811 | up   |
| H2-T10   | 0.496331386  | 6.495157418 | 32.4710569  | 3.59E-05 | 0.00949067  | up   |
| Gata3    | 0.478438662  | 5.460632684 | 31.93129084 | 3.93E-05 | 0.010139493 | up   |

|               |              |              |             |             |             |      |
|---------------|--------------|--------------|-------------|-------------|-------------|------|
| 2310043P16Rik | -0.469511323 | 4.845183681  | 31.45209376 | 4.26E-05    | 0.010749903 | down |
| Phlda1        | 0.632893386  | 3.668640729  | 31.39933915 | 4.30E-05    | 0.010749903 | up   |
| Gm6485        | 0.573763936  | 4.293008658  | 31.29123491 | 4.38E-05    | 0.010878326 | up   |
| Prf1          | -0.526470288 | 4.698526994  | 31.14873343 | 4.49E-05    | 0.011020132 | down |
| Cd96          | 0.391531183  | 6.772226943  | 30.91351802 | 4.67E-05    | 0.011336563 | up   |
| Hspa1a        | 1.193041431  | 2.274212545  | 30.61463142 | 4.92E-05    | 0.011740692 | up   |
| lfih1         | 0.515962615  | 5.459553149  | 30.50430397 | 5.01E-05    | 0.011743092 | up   |
| Rplp0         | -0.508959036 | 11.18718039  | 38.09514085 | 5.02E-05    | 0.011743092 | down |
| Oas2          | 1.328110332  | 4.867872009  | 42.64900187 | 5.30E-05    | 0.012156876 | up   |
| Herc6         | 0.518994518  | 5.232969799  | 29.95960479 | 5.52E-05    | 0.012438951 | up   |
| lsg15         | 0.658298546  | 3.789460432  | 29.89187457 | 5.58E-05    | 0.012485831 | up   |
| Lgals9        | 0.385774916  | 6.902601492  | 29.84594526 | 5.63E-05    | 0.012536458 | up   |
| Ccdc69        | 0.652323118  | 3.286303019  | 29.72408455 | 5.75E-05    | 0.012605041 | up   |
| Jaml          | 0.658478398  | 3.589311119  | 29.6440082  | 5.83E-05    | 0.012734586 | up   |
| Kansl2        | 0.435694039  | 5.475771978  | 29.34291137 | 6.16E-05    | 0.013337206 | up   |
| Ttbk2         | -0.913148339 | 3.731807679  | 29.30114609 | 6.27E-05    | 0.013526229 | down |
| Cd48          | 0.44851169   | 4.674791057  | 29.17414991 | 6.35E-05    | 0.013632553 | up   |
| Wdr89         | 0.428529393  | 6.895519525  | 28.93981633 | 6.62E-05    | 0.014157199 | up   |
| Kctd12b       | -0.499241294 | 4.115733996  | 28.92119734 | 6.64E-05    | 0.014157199 | down |
| Zfp973        | -6.515598752 | -1.596454352 | 31.78451598 | 6.73E-05    | 0.014296421 | down |
| Prr7          | 0.743961026  | 3.337556982  | 28.71034269 | 6.90E-05    | 0.014538706 | up   |
| Ddx60         | 0.534675343  | 5.663811698  | 28.54437534 | 7.11E-05    | 0.014870066 | up   |
| 2410006H16Rik | 0.37977745   | 6.106845553  | 28.45068704 | 7.23E-05    | 0.015011926 | up   |
| C2cd3         | 0.405906584  | 6.371630184  | 28.3216807  | 7.41E-05    | 0.015312533 | up   |
| Gem           | 0.512804948  | 4.3137518    | 27.95662517 | 7.92E-05    | 0.016193518 | up   |
| Rilpl2        | 0.396002582  | 5.114442313  | 27.9037467  | 8.00E-05    | 0.016291911 | up   |
| Ap3s1         | -0.382172121 | 5.69045758   | 27.86745182 | 8.05E-05    | 0.016341038 | down |
| Gm14165       | 0.865408177  | 2.545814444  | 27.78136676 | 8.18E-05    | 0.016481936 | up   |
| Mast3         | 0.428530035  | 5.867573094  | 27.69174578 | 8.32E-05    | 0.016697378 | up   |
| Atxn3         | -0.411329824 | 5.786749521  | 27.58951123 | 8.48E-05    | 0.01695631  | down |
| Nrros         | 0.512213756  | 4.734398958  | 27.52570131 | 8.58E-05    | 0.017035134 | up   |
| Oas3          | 0.507713815  | 4.008594938  | 27.12963445 | 9.24E-05    | 0.018217824 | up   |
| Ptpn6         | 0.457219967  | 6.022786992  | 27.07429737 | 9.34E-05    | 0.0182643   | up   |
| Rasal3        | 0.402073523  | 7.565205663  | 27.06576139 | 9.36E-05    | 0.0182643   | up   |
| Dapl1         | 0.524117983  | 4.421822588  | 26.85573294 | 9.74E-05    | 0.018813708 | up   |
| Vcpkmt        | 0.706864601  | 2.812735403  | 26.48601139 | 0.000104473 | 0.019943384 | up   |

|               |              |             |             |             |             |      |
|---------------|--------------|-------------|-------------|-------------|-------------|------|
| Lmna          | 0.524305757  | 4.37105626  | 26.25209662 | 0.000109276 | 0.020716021 | up   |
| Batf          | 0.449519693  | 4.78738485  | 26.2285543  | 0.000109774 | 0.020738504 | up   |
| Lman2l        | 0.64234687   | 3.636200256 | 26.06554042 | 0.000113287 | 0.021255631 | up   |
| Ms4a4c        | 0.63790769   | 4.052022302 | 25.88096782 | 0.000117419 | 0.021806875 | up   |
| Polr2g        | 0.415742503  | 4.589478869 | 25.81678615 | 0.000118895 | 0.022006498 | up   |
| Pura          | -0.400319688 | 5.612313093 | 25.67505769 | 0.000122231 | 0.022471939 | down |
| Tbk1          | -0.409456422 | 6.482006807 | 25.62389042 | 0.000123461 | 0.022471939 | down |
| Mki67         | 0.776092868  | 3.379251059 | 25.57307813 | 0.000124696 | 0.022621642 | up   |
| 4933412E12Rik | 1.041501288  | 2.059177464 | 25.46060294 | 0.000127481 | 0.022974645 | up   |
| Eif2ak2       | 0.537059446  | 4.362254724 | 25.38103989 | 0.000129493 | 0.023260763 | up   |
| Hba-a1        | 1.856226626  | 3.980806417 | 37.73597221 | 0.00013408  | 0.023772951 | up   |
| Gpat3         | -0.514951399 | 3.568604757 | 25.16572512 | 0.000135121 | 0.023880188 | down |
| App           | -0.509252807 | 4.430205837 | 25.05224592 | 0.000138198 | 0.024345441 | down |
| Adprhl2       | 0.66531778   | 4.505485684 | 24.79993261 | 0.000145327 | 0.02537625  | up   |
| BC147527      | 0.91718032   | 2.366649007 | 24.79608721 | 0.000145439 | 0.02537625  | up   |
| Fam241a       | -0.456644345 | 4.583561478 | 24.73384277 | 0.000147262 | 0.025612865 | down |
| Bcl9l         | 0.404570807  | 5.699207766 | 24.27655523 | 0.00016148  | 0.027526669 | up   |
| Ccpg1         | 0.425228913  | 6.07451144  | 24.23749293 | 0.000162765 | 0.027526669 | up   |
| Ndfip1        | -0.402554193 | 7.271413869 | 24.22550688 | 0.000163161 | 0.027526669 | down |
| Tspan32       | 0.527256263  | 5.093379963 | 24.1238132  | 0.00016657  | 0.027907864 | up   |
| Bmf           | 0.762279437  | 2.705219878 | 24.06512298 | 0.000168574 | 0.028157474 | up   |
| Pwwp2b        | 0.858400959  | 1.957914161 | 23.97532301 | 0.000171693 | 0.028504613 | up   |
| Trav14d-3-dv8 | 0.457268626  | 3.760585294 | 23.90308491 | 0.000174249 | 0.028660574 | up   |
| Zgpat         | 0.496972737  | 5.320272861 | 23.7433343  | 0.000180056 | 0.029134618 | up   |
| Ly6c1         | 0.494667978  | 5.734828323 | 23.73746988 | 0.000180273 | 0.029134618 | up   |
| Abi3          | 0.70383888   | 2.765512397 | 23.43875836 | 0.000191744 | 0.030664732 | up   |
| Pex26         | 0.948195256  | 2.843029305 | 23.18122453 | 0.000202299 | 0.032219071 | up   |
| Bst2          | 0.472044031  | 5.143463518 | 23.16136563 | 0.00020314  | 0.032259203 | up   |
| Ifi44         | 1.003910683  | 1.860544616 | 22.94361607 | 0.000212623 | 0.033378129 | up   |
| Trim30d       | 0.558174323  | 4.491149108 | 22.64131872 | 0.000226629 | 0.034779564 | up   |
| Tigit         | -0.473738239 | 4.476319039 | 22.45595385 | 0.000235732 | 0.03570398  | down |
| Rbm4          | 0.405912592  | 4.818467919 | 22.14655038 | 0.000251862 | 0.037496588 | up   |
| Hexa          | 0.397523509  | 4.520322178 | 22.12908507 | 0.000252809 | 0.037535585 | up   |
| Gm7993        | 0.536403473  | 3.911793914 | 22.08548345 | 0.000255191 | 0.037684985 | up   |
| Sh2d3c        | 0.442968785  | 4.618186076 | 22.03970535 | 0.000257719 | 0.037717895 | up   |
| Lbp           | 1.12262062   | 0.894663614 | 22.0316377  | 0.000258167 | 0.037717895 | up   |



|          |              |             |             |             |             |      |
|----------|--------------|-------------|-------------|-------------|-------------|------|
| Sema4b   | 0.473355648  | 4.03216719  | 21.94745217 | 0.0002629   | 0.038205593 | up   |
| Coro2a   | 0.794775694  | 2.361332712 | 21.91757317 | 0.000264603 | 0.038294599 | up   |
| Phf11b   | 0.44862339   | 4.354933656 | 21.898891   | 0.000265675 | 0.038304006 | up   |
| Gramd1a  | 0.769858619  | 8.048232607 | 30.52544435 | 0.00027518  | 0.039267789 | up   |
| Oas1a    | 0.627301927  | 3.302747323 | 21.73600013 | 0.000275226 | 0.039267789 | up   |
| Parp10   | 0.423040309  | 5.429251044 | 21.71161293 | 0.00027669  | 0.03937401  | up   |
| Arhgap26 | 0.555328726  | 3.603080637 | 21.57300692 | 0.000285175 | 0.040301815 | up   |
| Emp3     | 0.423502661  | 4.776822767 | 21.18079032 | 0.000310823 | 0.042466505 | up   |
| Camta2   | 0.382517664  | 4.596697354 | 21.13169246 | 0.000314214 | 0.042716699 | up   |
| mt-Tl1   | 0.480374695  | 3.585138769 | 21.08853836 | 0.000317228 | 0.042807872 | down |
| Emp1     | 0.851300172  | 2.741046267 | 21.05438187 | 0.000319638 | 0.042893957 | down |
| Cln3     | 0.706927303  | 3.222071074 | 21.04110852 | 0.00032058  | 0.042893957 | up   |
| Fam83d   | 0.671130151  | 3.148375202 | 21.03522565 | 0.000320998 | 0.042893957 | up   |
| Smim10l1 | 0.439208565  | 4.35947545  | 21.01498897 | 0.000322442 | 0.042982097 | down |
| Gadl1    | 7.276231174  | 2.689778348 | 22.62989854 | 0.000327963 | 0.043506337 | up   |
| Csrnp2   | 0.444193877  | 4.955698613 | 20.85998609 | 0.00033375  | 0.044167108 | up   |
| D2hgdh   | 0.47795263   | 3.728810603 | 20.82255068 | 0.000336548 | 0.044323245 | up   |
| Tap1     | 0.46608729   | 7.019559384 | 22.47424276 | 0.000341185 | 0.044554412 | up   |
| Pigw     | -0.731868808 | 3.04457625  | 20.74848203 | 0.000342163 | 0.044554412 | down |
| Nfkbie   | 0.57025561   | 5.486258702 | 21.38732535 | 0.000390355 | 0.049277326 | up   |
| Gm26885  | 0.482965576  | 4.191308734 | 20.12185731 | 0.000394139 | 0.049640633 | up   |
| Rnf157   | 0.543403126  | 4.146726113 | 20.08989228 | 0.00039702  | 0.049661069 | up   |

1295

1296

1297 **Supplemental Table 2.** Participants of patients with SLE and their healthy

1298 controls (attached table in excel)

| Sample ID  | Age (years) | Sex | Ethnicity | Glucocorticoid does (PDN, median ranges, mg/day) | MTX | HCQ | AZA | MMF | CsA | CTX | SLED AI score (median ranges) | ANA |
|------------|-------------|-----|-----------|--------------------------------------------------|-----|-----|-----|-----|-----|-----|-------------------------------|-----|
| Patient 1  | 48          | F   | Asian     | /                                                | no  | no  | no  | no  | no  | no  | 0                             | yes |
| Patient 2  | 28          | F   | Asian     | 10mg/d                                           | no  | no  | no  | no  | no  | no  | 0                             | yes |
| Patient 3  | 63          | F   | Asian     | 7.5mg/d                                          | no  | no  | yes | no  | no  | no  | 1                             | yes |
| Patient 4  | 52          | F   | Asian     | 5mg/d                                            | no  | yes | no  | no  | no  | no  | 4                             | yes |
| Patient 5  | 45          | F   | Asian     | 2.5mg/d                                          | no  | yes | no  | no  | no  | no  | 0                             | yes |
| Patient 6  | 24          | F   | Asian     | 5mg/d                                            | no  | yes | no  | no  | no  | no  | 0                             | yes |
| Patient 7  | 43          | F   | Asian     | 5mg/d                                            | yes | yes | no  | no  | no  | no  | 2                             | yes |
| Patient 8  | 36          | F   | Asian     | 7.5mg/d                                          | yes | yes | no  | no  | no  | no  | 3                             | yes |
| Patient 9  | 37          | F   | Asian     | 12.5mg/d                                         | no  | yes | yes | no  | no  | no  | 4                             | yes |
| Patient 10 | 49          | F   | Asian     | 3.75mg/d                                         | no  | yes | no  | yes | no  | no  | 0                             | yes |
| Control 1  | 44          | F   | Asian     |                                                  |     |     |     |     |     |     |                               |     |
| Control 2  | 28          | F   | Asian     |                                                  |     |     |     |     |     |     |                               |     |
| Control 3  | 68          | F   | Asian     |                                                  |     |     |     |     |     |     |                               |     |
| Control 4  | 51          | F   | Asian     |                                                  |     |     |     |     |     |     |                               |     |
| Control 5  | 45          | F   | Asian     |                                                  |     |     |     |     |     |     |                               |     |
| Control 6  | 24          | F   | Asian     |                                                  |     |     |     |     |     |     |                               |     |
| Control 7  | 42          | F   | Asian     |                                                  |     |     |     |     |     |     |                               |     |
| Control 8  | 38          | F   | Asian     |                                                  |     |     |     |     |     |     |                               |     |
| Control 9  | 35          | F   | Asian     |                                                  |     |     |     |     |     |     |                               |     |
| Control 10 | 44          | F   | Asian     |                                                  |     |     |     |     |     |     |                               |     |

Drug history recorded the information in the past 1 month.

F: female; PDN: prednisone; MTX: methotrexate; HCQ: hydroxychloroquine; AZA: azathioprine; CsA: cyclosporin; MMF: mycophenolate mofetil; CTX: cyclophosphamide; CNS: central nervous system; ANA: antinuclear antibody

1299

1300

1301
